# Supplementary material for: Facile method based on19F-NMR for the determination of hydroxyl value and molecular weight of hydroxyl terminated polymers
Source: Royal Society of Chemistry journal article supplement (doi:10.1039/c8an02518e), 2019-01-01
Supplement: c8an02518e1.pdf [file c8an02518e1.pdf]

**Electronic Supplementary Information**

**Facile method based on  $^{19}\text{F}$ -NMR for the determination of hydroxyl value and molecular weight of hydroxyl terminated polymers**

Giacomo Foli <sup>a,b</sup>, Micaela Degli Esposti <sup>a,b,\*</sup>, Maurizio Toselli <sup>c</sup>, Davide Morselli <sup>a,d,\*</sup>  
and Paola Fabbri <sup>a,b</sup>

<sup>a</sup> *Department of Civil, Chemical, Environmental and Materials Engineering (DICAM),  
University of Bologna, Via Terracini 28, 40131 Bologna, Italy*

<sup>b</sup> *Italian Consortium for Science and Technology of Materials (INSTM), Via Giusti 9,  
50121 Firenze, Italy*

<sup>c</sup> *Department of Industrial Chemistry "Toso Montanari", University of Bologna, Viale  
del Risorgimento 4, 40136 Bologna, Italy*

<sup>d</sup> *Smart Materials, Istituto Italiano di Tecnologia, Via Morego 30, 16163, Genova,  
Italy*

\* Corresponding Authors:

Davide Morselli

davide.morselli6@unibo.it

Tel.: +39 051 2090363

Micaela Degli Esposti

micaela.degliestposti@unibo.it

+39 051 2090363

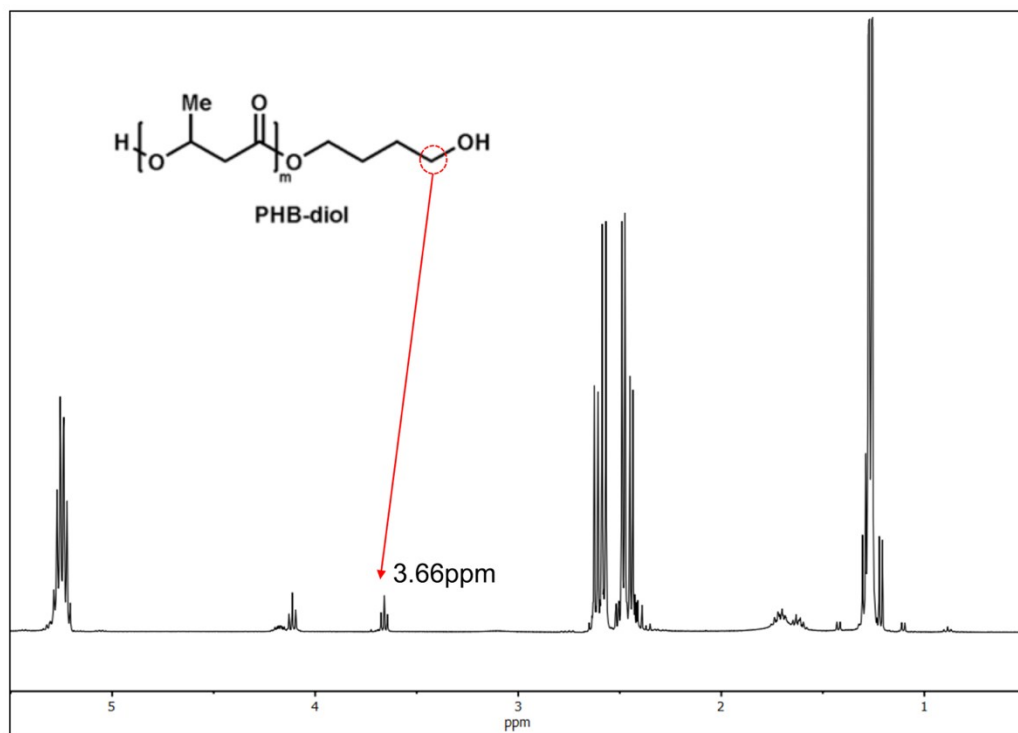

**Figure S1.** Representative <sup>1</sup>H-NMR spectrum for the synthesized PHB-diols.

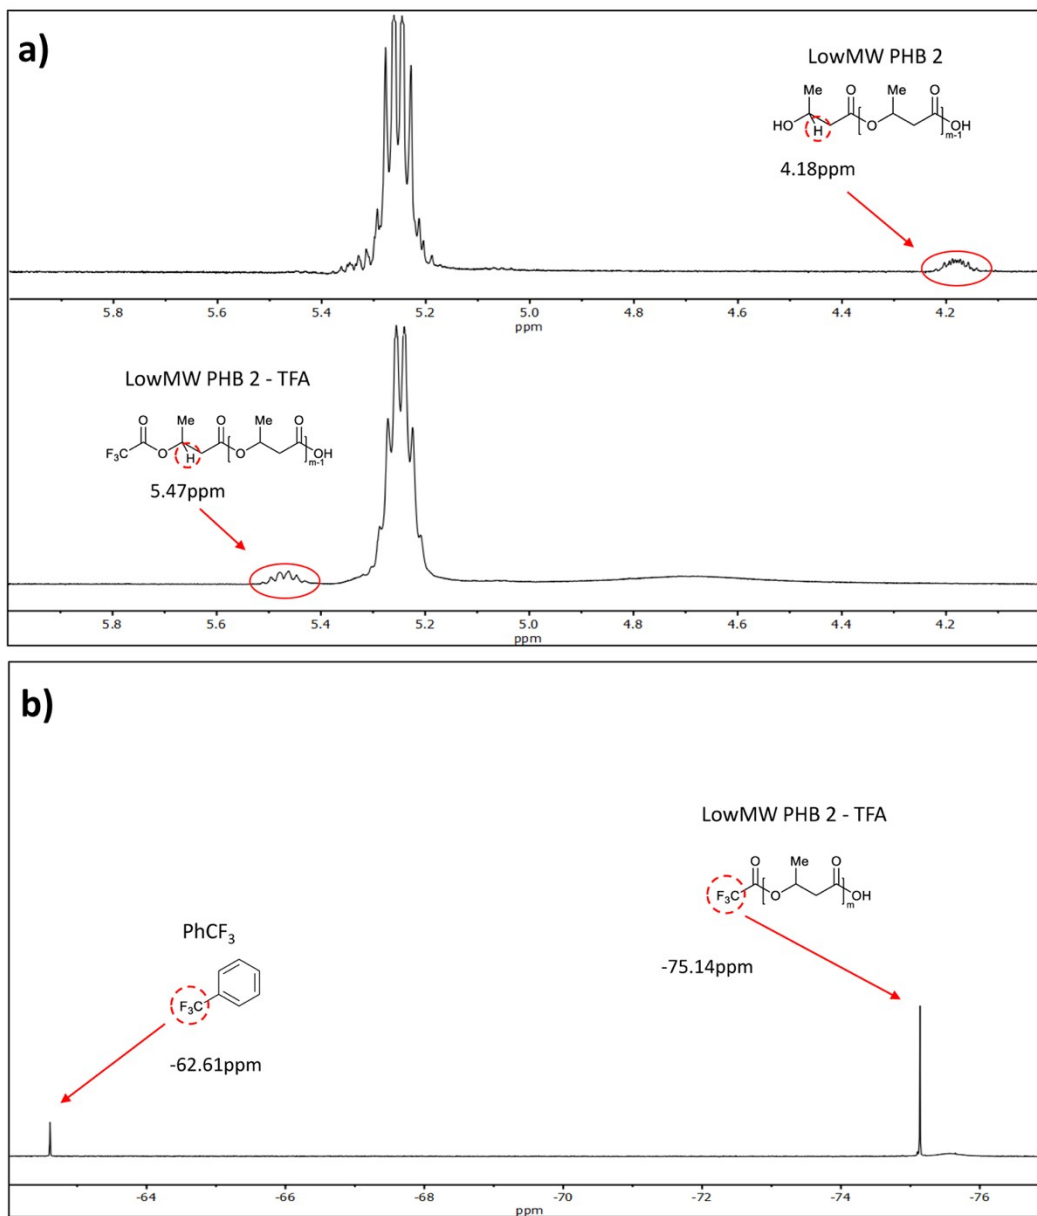

**Figure S2.** (a) Comparison between <sup>1</sup>H-NMR spectra (terminal region): LowMW PHB 2 (up) and LowMW PHB 2-TFA after 30 minutes of reaction (down). (b) <sup>19</sup>F-NMR spectrum of LowMW PHB 2-TFA.

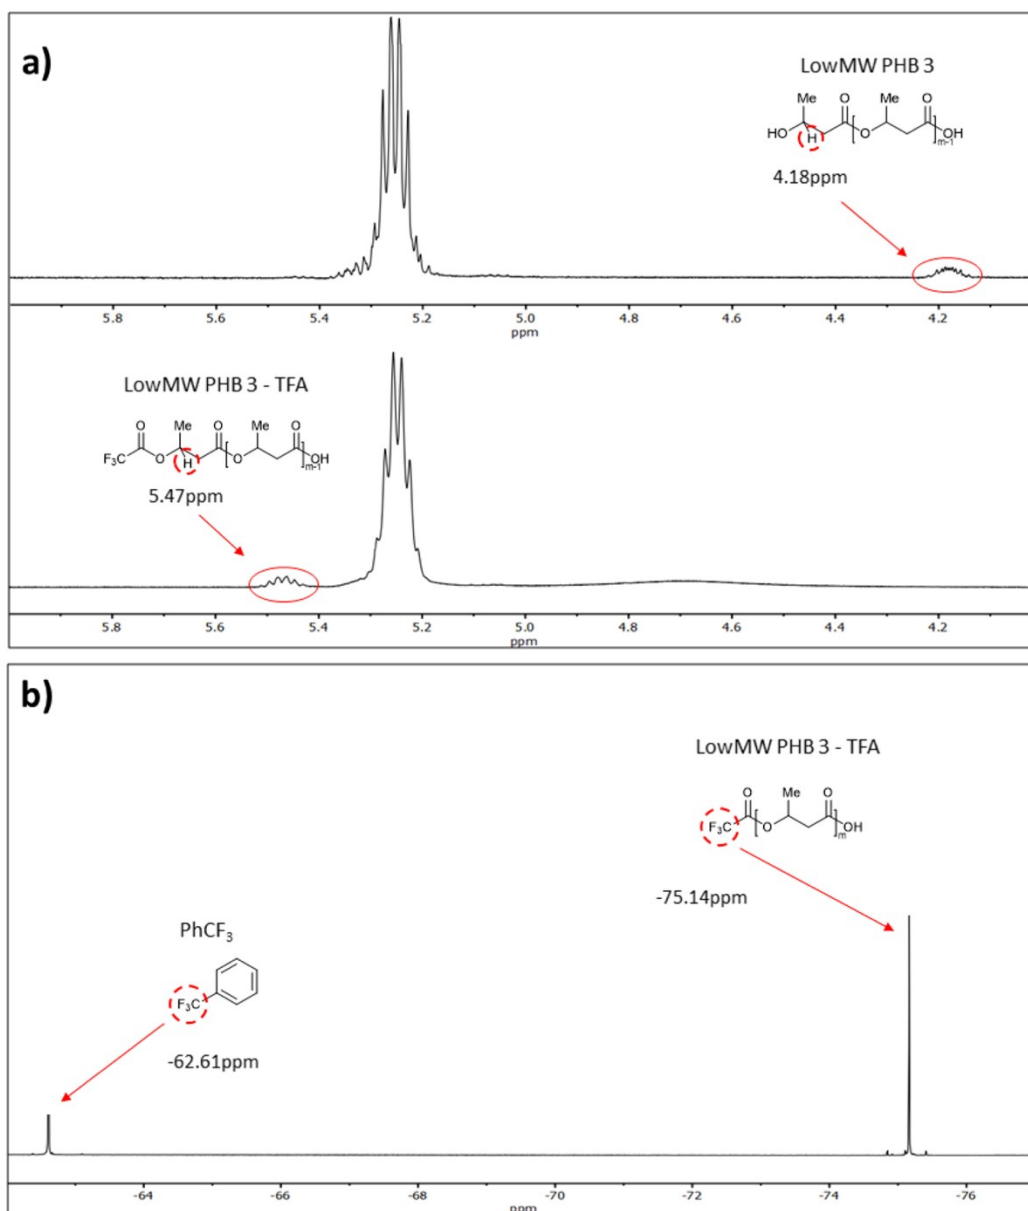

**Figure S3.** (a) Comparison between <sup>1</sup>H-NMR spectra (terminal region): LowMW PHB 3 (up) and LowMW PHB 3-TFA after 30 minutes of reaction (down). (b) <sup>19</sup>F-NMR spectrum of LowMW PHB 3-TFA.

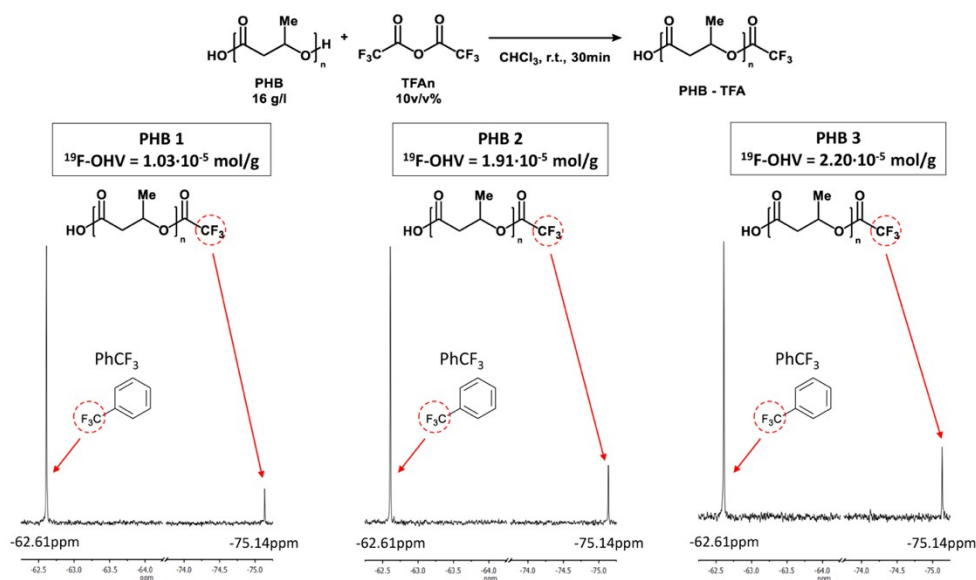

**Figure S4.**  $^{19}\text{F}$ -NMR spectra of all analyzed PHB samples. At -62.61 ppm, singlet due to internal standard ( $\text{PhCF}_3$ ) is visible, while trifluoromethyl moieties of PHB-TFA have a chemical shift of -75.14 ppm.

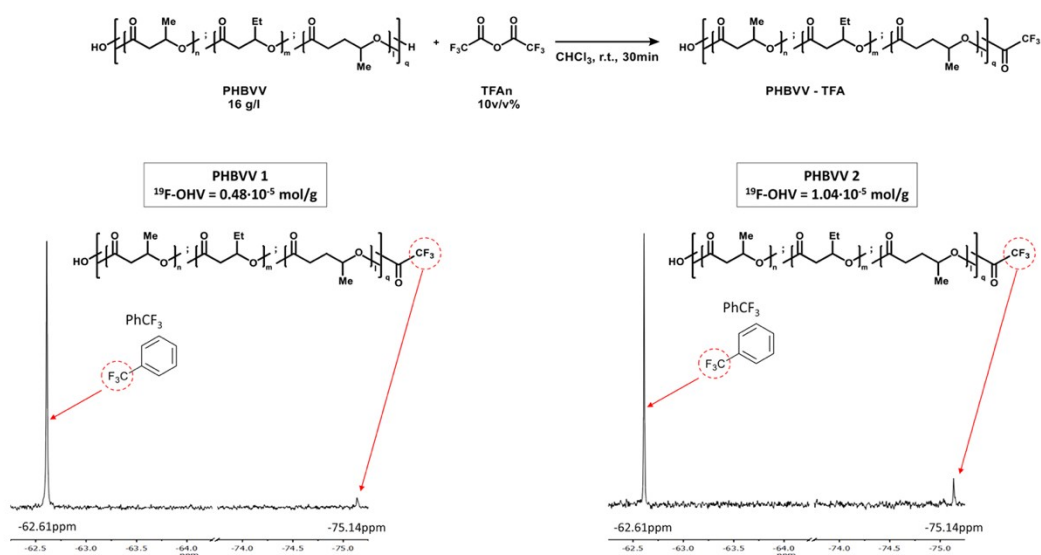

**Figure S5.**  $^{19}\text{F}$ -NMR spectra of all analyzed PHBVV samples. At -62.61 ppm, singlet due to internal standard ( $\text{PhCF}_3$ ) is visible, while trifluoromethyl moieties of PHBVV-TFA have a chemical shift of -75.14 ppm.

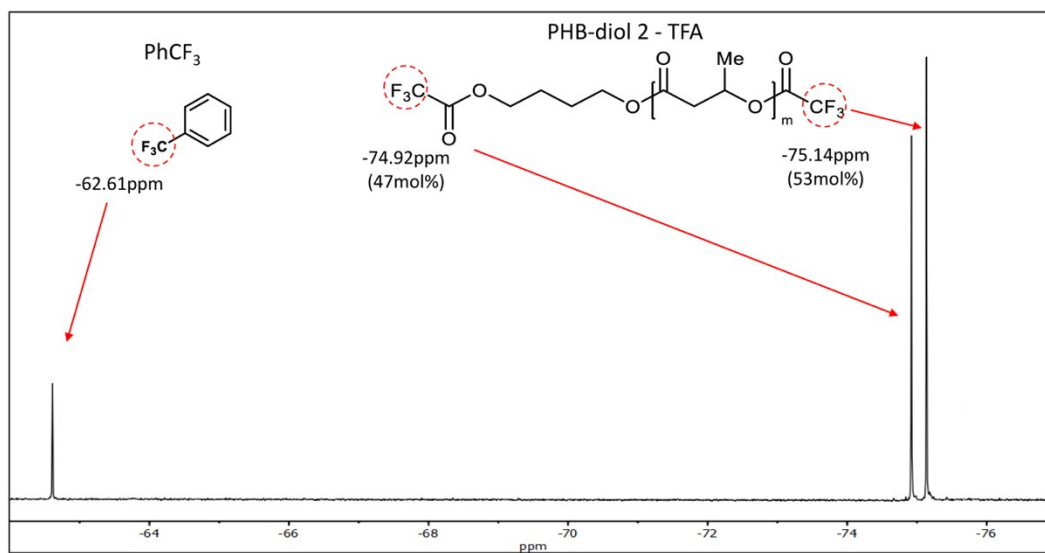

**Figure S6.**  $^{19}\text{F}$ -NMR spectrum of trifluoroacetylated PHB-diol 2 (PHB-diol 2-TFA).

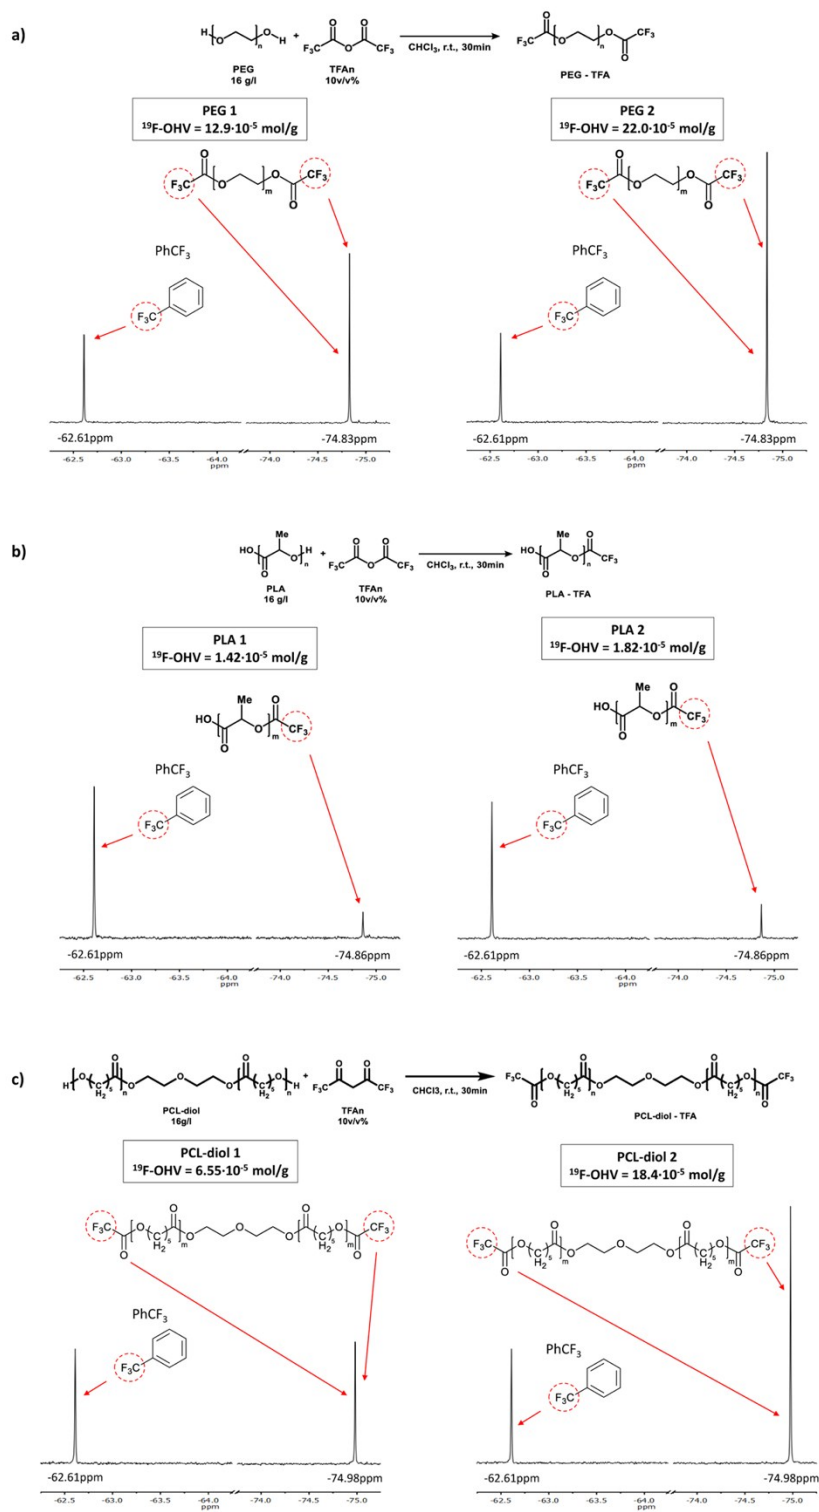

**Figure S7.**  $^{19}\text{F}$ -NMR spectra of trifluoroacetylated hydroxyl terminated commercial polymers: (a) PEG, (b) PLA, (c) PCL-diol.
